# Supplementary material for: Repeatability of adaptation in sunflowers reveals that genomic regions harbouring inversions also drive adaptation in species lacking an inversion
Source: eLife. 2023 Dec 14;12:RP88604. doi: 10.7554/eLife.88604 (PMC10721221; doi:10.7554/eLife.88604)
Supplement: Supplementary file 1. [file elife-88604-supp1.xlsx]

## Sheet: Populations, environ. variables
Population ID	Voucher Number	Herbarium	Taxon	Collected	Country	State or Province	USA County	Location Description	Elevation (m)	Latitude	Longitude	Ecology	Major Associated Woody Plant Genera	Abundance and Form	Population Size Estimate
ANN_01	1794	IND	Helianthus annuus	2015-08-30	United States	California	Yolo	Yolo Bypass, N of Interstate 80	6	38.5654	-121.638	Grassland on flat, with deep soil derived from alluvium	Populus, Scirpus, and Salix.	Abundant. Annual herb, up to 1.5 m tall.	10000
ANN_02	1796	IND	Helianthus annuus	2015-08-31	United States	California	San Benito	Panoche Creek, roadside on Panoche Road, E of Panoche	295	36.595	-120.758	Wetland on banks of perennial watercourse, with deep soil derived from alluvial parent material	Salix, Typha, and Atriplex.	Infrequent. Annual herb, up to 3.0 m tall.	100
ANN_03	1797	IND	Helianthus annuus	2015-08-31	United States	California	Fresno	Anticline Ridge, roadside on Shell Road, just W of intersection with California State Route 33	295	36.2454	-120.317	Shrubland on bottom of SE-trending ravine, with deep soil derived from alluvium	Salsola and Atriplex.	Abundant. Annual herb, up to 2.0 m tall.	2000
ANN_04	1798	IND	Helianthus annuus	2015-09-01	United States	California	Ventura	Lockwood Valley, roadside on Lockwood Valley Road	1560	34.7509	-119.072	Herbaceous plant community on bottom of drying vernal pool, with deep soil derived from alluvium and other sediment	Ericameria and Artemisia.	Abundant. Annual herb, up to 1.0 m tall.	1000
ANN_05	1799	IND	Helianthus annuus	2015-09-01	United States	California	Riverside	Coachella Valley, W of Harrison Street and NE of Old California 86	-14	33.6928	-116.184	Fallow agricultural field, with deep soil derived from alluvium	Salsola, Datura, and Ricinus.	Abundant. Annual herb, up to 3.0 m tall.	1000
ANN_06	1800	IND	Helianthus annuus	2015-09-02	United States	California	San Bernardino	Cajon Canyon, roadside on Cajon Boulevard	738	34.2498	-117.451	Chaparral and woodland on N-facing slope, with shallow, rocky soil derived from granite parent material	Eriogonum, Artemisia, Prunus, Juglans, and Platanus.	Abundant. Annual herb, up to 2.5 m tall.	10000
ANN_07	1802	IND	Helianthus annuus	2015-09-11	United States	California	Alpine	Luther Pass, roadside on California State Route 89	2330	38.7892	-119.936	Forest and disturbed roadside vegetation, with deep soil from granite parent material	Pinus, Juniperus, Arctostaphylos, Purshia, Ceanothus, and Abies	Locally abundant. Annual herb, up to 0.5 m tall.	100
ANN_08	1803	IND	Helianthus annuus	2015-09-11	United States	California	Alpine	East Fork Carson River Canyon, roadside on California State Route 89	1710	38.6772	-119.739	Woodland on steep, S-facing slope, with rocky soil derived from conglomerate parent material	Pinus, Artemisia, Purshia, and Ericameria.	Locally abundant. Annual herb, up to 1.0 m tall.	2000
ANN_09	1804	IND	Helianthus annuus	2015-09-11	United States	California	Inyo	Fish Slough, at intersection of Fish Slough Road and Upper Canal Road	1270	37.4332	-118.406	Riparian shrubland on banks of perennial stream	Ericameria, Typha, Helianthus, and Populus.	Locally abundant. Annual herb, up to 1.5 m tall.	1000
ANN_10	1805	IND	Helianthus annuus	2015-09-12	United States	California	Inyo	Lone Pine, East side, roadside on California State Route 168, W of Owens River	1205	37.1735	-118.279	Grassland on flat, with deep soil	Ericameria, Salix, Rosa, and Salsola.	Locally abundant. Annual herb, up to 1.5 m tall.	10000
ANN_11	1806	IND	Helianthus annuus	2015-09-12	United States	Arizona	Mohave	E of Kingman, roadside on U.S. Route 40	1030	35.1957	-114.067	Shrubland and grassland on roadside, with deep soil from limestone, caliche, and sedimentary parent material	Encelia, Eriogonum, and Salsola	Locally abundant. Annual herb, up to 2.0 m tall.	1000
ANN_12	1807	IND	Helianthus annuus	2015-09-13	United States	Arizona	Coconino	Williams area, roadside on Forest Road 51A	2115	35.2533	-112.134	Grassland on flat near roadside, with deep soil	Ambrosia, Pinus, and Verbascum.	Locally abundant. Annual herb, up to 0.5 m tall.	1000
ANN_13	1811	IND	Helianthus annuus	2015-09-13	United States	Arizona	Yavapi	Verde River, vicinity of Deadhorse Lake	1005	34.7506	-112.017	Riparian forest and wetland, with deep soil from alluvium	Populus, Salix, Baccharis, Typha, and Xanthium.	Locally abundant. Annual herb, up to 2.0 m tall.	100
ANN_14	1813	IND	Helianthus annuus	2015-09-14	United States	Arizona	Coconino	Tuba City area, roadside on State Route 160 just W of Tuba City	1410	36.1086	-111.242	Disturbed, weedy roadside vegetation on flat, with deep soil from sedimentary parent material	Salsola, Sphaeralcea, and Populus.	Locally abundant. Annual herb, up to 2.0 m tall.	200
ANN_15	1815	IND	Helianthus annuus	2015-09-14	United States	Arizona	Navajo	Winslow, W side, roadside on W Winslow Industrial Spur, near exit 252 on U.S. Route 40	1515	35.0385	-110.735	Weedy vacant lot and roadside ditch, with deep soil from sandstone	Salsola and Grindelia.	Locally abundant. Annual herb, up to 2.0 m tall.	10000
ANN_16	1817	IND	Helianthus annuus	2015-09-15	United States	New Mexico	McKinley	Thoreau, S side, roadside frontage road (New Mexico 122) along U.S. Route 40	2180	35.4004	-108.236	Grassland and shrubland on flat, with deep soil from sedimentary parent material	Artemisia, Grindelia, and Atriplex.	Locally abundant. Annual herb, up to 2.0 m tall.	10000
ANN_17	1818	IND	Helianthus annuus	2015-09-15	United States	New Mexico	Cibola	Mount Taylor, W slope, roadside on New Mexico State Route 547	2425	35.245	-107.686	Woodland and grassland in E-W trending ravine on a W-facing slope, with rocky soil from volcanic parent material	Pinus, Juniperus, and Atriplex.	Infrequent. Annual herb, up to 2.5 m tall.	100
ANN_18	1820	IND	Helianthus annuus	2015-09-16	United States	New Mexico	Harding	Canadian River watershed, SW of Mills, roadside on Mills Canyon Road	1810	36.0731	-104.289	Grassland on gentle, S-facing slope near bottom of ravine, w deep soil from sedimentary parent material	Grindelia, Artemisia, and Salsola.	Abundant. Annual herb, up to 2.0 m tall.	1000
ANN_19	1822	IND	Helianthus annuus	2015-09-16	United States	New Mexico	Colfax	Capulin area, roadside on A-18, SW of Capulin	2090	36.7268	-104.019	Grassland on flat, with deep soil from volcanic parent material	Salsola, Chenopodium, and Solanum.	Locally abundant. Annual herb, up to 2.0 m tall.	1000
ANN_20	1827	IND	Helianthus annuus	2015-09-17	United States	Colorado	Montrose	Cerro Summit, E side, roadside on U.S. Route 50	2390	38.4437	-107.629	Grassland on S-facing slope and roadside ditch, with deep soil from volcanic parent material	Artemisia and Ericameria.	Locally abundant. Annual herb, up to 1.5 m tall.	1000
ANN_21	1828	IND	Helianthus annuus	2015-09-17	United States	Colorado	Mesa	Smith Ditch, roadside on U.S. Route 50, SE of Grand Junction	1525	38.91	-108.374	Banks of operating irrigation canal, with deep soil from sedimentary parent material	Atriplex, Populus, Ericameria, and Xanthium.	Locally abundant. Annual herb, up to 3.0 m tall.	100
ANN_22	1829	IND	Helianthus annuus	2015-09-17	United States	Colorado	Mesa	Gunnison River Canyon, roadside on U.S. Route 50	1460	39.0067	-108.464	Shrubland in shallow ravine bottom and slopes, with rocky soil derived from sedimentary parent material	Chenopodium, Opuntia, Salsola, Asclepias, and Tamarix.	Locally abundant. Annual herb, up to 2.0 m tall.	1000
ANN_23	1830	IND	Helianthus annuus	2015-09-18	United States	Nevada	Eureka	Emmigrant Pass, E end, S of Mary's Mountain, roadside on U.S. Route 80	1790	40.6626	-116.239	Grassland and disturbed roadside vegetation on S-facing slope, with deep soil from conglomerate parent material	Salsola and Ericameria.	Locally abundant. Annual herb, up to 1.5 m tall.	100
ANN_24	1831	IND	Helianthus annuus	2015-09-18	United States	Nevada	Washoe	Truckee River Canyon, roadside on U.S. Route 80	1540	39.4889	-119.995	Grassland and disturbed roadside vegetation, with deep soil from granite parent material	Pinus, Purshia, Artemisia, Ericameria, and Cercocarpus.	Locally abundant. Annual herb, up to 1.5 m tall.	200
ANN_25	1838	IND	Helianthus annuus	2015-10-03	United States	Nevada	Clark	Mesquite, roadside on Hafen Lane	480	36.7965	-114.098	Disturbed shrubland on gentle, S-facing slope, with deep soil derived from sandstone parent material	Salsola	Locally abundant. Annual herb, up to 2.5 m tall.	100
ANN_26	1839	IND	Helianthus annuus	2015-10-03	United States	Utah	Washington	Washington, roadside on West Buena Vista Boulevard, between Buena Vista Boulevard and Interstate 15	875	37.1373	-113.513	Distrubed grassland and woodland on flat near small reservior	Populus, Atriplex, Salix, Rumex, and Salsola.	Locally abundant. Annual herb, up to 3.0 m tall.	1000
ANN_27	1841	IND	Helianthus annuus	2015-10-03	United States	Utah	Kane	Three Lakes Canyon, roadside on U.S. Route 89, N of Kanab	1660	37.1314	-112.566	Woodland and weedy roadside on flat, with deep soil derived from sandstone parent material	Populus, Salix, Lotus, Juniperus, and Quercus.	Locally abundant. Annual herb, up to 2.0 m tall.	1000
ANN_28	1843	IND	Helianthus annuus	2015-10-04	United States	Utah	Beaver	Roadside on Interstate 15, just S of Beaver	1840	38.2165	-112.648	Grassland on flat and roadside ditch, with deep soil from volcanic parent material	Ericameria, Artemisia, and Grindelia.	Locally abundant. Annual herb, up to 1.0 m tall.	1000
ANN_29	1844	IND	Helianthus annuus	2015-10-04	United States	Utah	Millard	Roadside on U.S. Route 6, N of Lynndyl	1465	39.5501	-112.357	Shrubland in roadside ditch, with deep, sandy soil	Ericameria, Artemisia, Asclepias, and Salsola.	Locally abundant. Annual herb, up to 1.5 m tall.	1000
ANN_30	1845	IND	Helianthus annuus	2015-10-04	United States	Utah	Juab	Jericho Junction, near Jericho, at intersection of U.S. Route 6 and unnamed road to Little Sahara Recreation Area	1590	39.7148	-112.207	Grassland on gentle, W-facing slope, with deep, sandy soil	Ericameria and Salsola.	Abundant. Annual herb, up to 1.0 m tall.	10000
ANN_31	1846	IND	Helianthus annuus	2015-10-04	United States	Utah	Utah	Utah Lake area, City of Springville, S of Hobble Creek, near intersection of N2250W and W800N	1380	40.1781	-111.651	Herbaceous vegetation in recently graded vacant lot, with very rocky soil	Salsola, Chenopodium, and Polygonum.	Abundant. Annual herb, up to 2.0 m tall.	10000
ANN_32	1847	IND	Helianthus annuus	2015-10-05	United States	Utah	Box Elder	Perry, near intersection of Highway 91 and Interstate 15, S of U.S. Route 91	1295	41.4852	-112.056	Grassland on flat, with deep soil derived from alluvium	Ericameria, Grindelia, Salsola, and Tamarix.	Abundant. Annual herb, up to 1.5 m tall.	1000
ANN_33	1848	IND	Helianthus annuus	2015-10-05	United States	Utah	Salt Lake	Lee Creek area, roadside on North Temple Frontage Road (US Route 80 frontage road), SE shore of Great Salt Lake	1295	40.7711	-112.15	Grassland on flat, with deep soil derived from sediment	Ericameria, Salsola, and Grindelia.	Abundant. Annual herb, up to 2.0 m tall.	1000
ANN_34	1849	IND	Helianthus annuus	2015-10-05	United States	Utah	Tooele	Lake Point, interchange at intersection of U.S. Route 80 and Utah State Route 36	1295	40.6915	-112.264	Grassland on flat, with deep soil derived from sediment	Salsola and Apocynum.	Abundant. Annual herb, up to 1.5 m tall.	1000
ANN_35	1851	IND	Helianthus annuus	2015-10-11	United States	Utah	Uintah	Vernal area, E of Steinaker Reservoir, roadside on unnamed road N of 500 E Street and E of Utah State Route 191	1670	40.5127	-109.519	Grassland on gentle, S-facing slope, with deep soil derived from sedimentary parent material	Ericameria, Salsola, and Juniperus.	Abundant. Annual herb, up to 2.0 m tall.	1000
ANN_36	1852	IND	Helianthus annuus	2015-10-12	United States	Wyoming	Carbon	Roadside on U.S. Route 80, W of Rawlins	2040	41.7743	-107.459	Grassland and shrubland on in roadside ditch and swale	Polygonum.	Abundant. Annual herb, up to 1.0 m tall.	1000
ANN_37	1854	IND	Helianthus annuus	2015-10-13	United States	Colorado	Larimer	Loveland area, roadside on South Shields Street, just S of intersection with Truxtun Drive	1550	40.4868	-105.096	Grassland on gentle, E-sloping side of drainage, with deep soil derived from sedimentary parent material	Typha, Asclepias, Rumex, Ericameria, and Helianthus.	Abundant. Annual herb, up to 1.5 m tall.	10000
ANN_38	1861	IND	Helianthus annuus	2015-10-15	United States	Kansas	Barton	Cheyenne Bottoms, intersection of Cheyenne Bottoms Road and K-156	555	38.4412	-98.6323	Wetland in slough and adjacent grassland, with deep soil derived from sediment	Solidago, Rumex, Typha, and Xanthium.	Abundant. Annual herb, up to 2.0 m tall.	1000
ANN_39	1864	IND	Helianthus annuus	2015-10-16	United States	Kansas	Sumner	Norwich area, roadside on SE 130 Street, at intersection with SE 110 Avenue, E of Norwich	445	37.4591	-97.9179	Grassland and riparian forest in flat and in roadside ditch	Helianthus, Apocynum, Celtis, Salix, Solidago, and Typha.	Infrequent. Annual herb, up to 3.5 m tall.	150
ANN_40	1866	IND	Helianthus annuus	2015-10-16	United States	Kansas	Barber	Gypsum Hills, Cedar Creek watershed, roadside on Gypsum Hill Road	555	37.2333	-98.6646	Grassland on gentle, W-facing slope and roadside, with deep soil derived from sedimentary parent material, including gypsum	Juniperus, Celtis, Artemisia, and Andropogon.	Infrequent. Annual herb, up to 1.5 m tall.	50
ANN_41	1871	IND	Helianthus annuus	2015-10-17	United States	Oklahoma	Alfalfa	Salt Plains, roadside on Oklahoma State Highway 11	355	36.8087	-98.2224	Herbaceous vegetation on alluvial flat between river courses, with deep soil derived from alluvium	Polygonum, Tamarix, and Sorghum.	Abundant. Annual herb, up to 4.5 m tall.	100000
ANN_42	1875	IND	Helianthus annuus	2015-10-19	United States	Texas	Tarrant	Haslet area, roadside on Fossil Springs Drive, near intersection with West Bonds Ranch Road	235	32.9222	-97.3655	Grassland on flat, with deep soil	Salsola, Xanthium, and Sorghum.	Abundant. Annual herb, up to 2.0 m tall.	10000
ANN_43	1876	IND	Helianthus annuus subsp. texanus	2015-10-20	United States	Texas	Caldwell	Roadside on Texas State Highway 183, N of Luling	145	29.7331	-97.6557	Grassland on flat and E-facing, gentle slope, with rocky soil derived from limestone parent material	Grindelia, Quercus, Opuntia, and Schinus.	Locally abundant. Annual herb, up to 1.8 m tall.	1000
ANN_44	1880	IND	Helianthus annuus subsp. texanus	2015-10-21	United States	Texas	Frio	Moore, roadside on U.S. Route 35 Frontage Road	215	29.0519	-99.0181	Grassland and savanna on flat, with rocky soil derived from limestone	Yucca, Schinus, and Acacia.	Abundant. Annual herb, up to 2.0 m tall.	1000
ANN_45	1881	IND	Helianthus annuus subsp. texanus	2015-10-21	United States	Texas	Maverick	Comanche Creek, roadside on U.S. Route 277	210	28.6308	-100.119	Grassland on banks of creek, with deep, sandy soil	Acacia and Ulmus.	Abundant. Annual herb, up to 2.0 m tall.	100
ANN_46	1919	IND	Helianthus annuus	2015-11-04	United States	California	Riverside	City of Banning, roadside on John Street, S of U.S. Route 10, S of railroad tracks	690	33.9232	-116.864	Herbaceous vegetation at roadside and train-track right-of-way, on flat, with rocky soil derived from granite alluvium	Salsola.	Abundant. Annual herb, up to 3.0 m tall.	10000
ANN_47	1920	IND	Helianthus annuus	2015-11-05	United States	Arizona	Pinal	Picacho area, roadside on U.S. Route 10	475	32.7316	-111.538	Grassland and disturbed desert scrub on flat, with deep soil derived from volcanic alluvium	Salsola, Larrea, and Prosopis.	Infrequent. Annual herb, up to 2.0 m tall.	100
ANN_48	1921	IND	Helianthus annuus	2015-11-05	United States	Arizona	Santa Cruz	Santa Cruz River Valley, Roadside on Interstate 19, N of Rio Rico	1030	31.5081	-111.013	Desert scrub and herbaceous roadside vegetation on flat, with deep soil derived from granite	Sambucus, Conyza, and Celtis.	Abundant. Annual herb, up to 4.0 m tall.	1000
ANN_49	1924	IND	Helianthus annuus	2015-11-06	United States	Arizona	Cochise	San Pedro River Valley, E of San Pedro River, roadside on East Hereford Road	1275	31.44	-110.105	Grassland on flat, with deep soil derived from alluvium	Prosopis.	Abundant. Annual herb, up to 4.0 m tall.	100000
ANN_50	1927	IND	Helianthus annuus	2015-11-06	United States	New Mexico	Grant	Separ area, Roadside on U.S. Route 10 Frontage Road	1370	32.1794	-108.385	Grassland on flat and shallow basin (periodically flooded), with deep soil derived from sediment	Prosopis, Salsola, and Sorghum.	Locally abundant. Annual herb, up to 2.0 m tall.	500
ANN_51	1938	IND	Helianthus annuus	2015-11-09	United States	New Mexico	Doña Ana	Rio Grande River flood plain, S of Mesquite, roadside on New Mexico State Route 478, N of intersection with Holguin Road	1170	32.1288	-106.674	Weedy irrigation ditch margins between road and agricultural fields, with deep soil derived from alluvium	Amaranthus, Solanum, Sorghum, and Salsola.	Infrequent. Annual herb, up to 3.0 m tall.	50
ANN_52	1941	IND	Helianthus annuus	2015-11-10	United States	Texas	Reeves	Ninemile Draw, just E of junctiom between U.S. Route 10 and U.S. Route 20, near Exit 3 on U.S. Route 20, N of Interstate 20 Service Road	1140	31.1331	-104.02	Weedy roadside vegetation in ditch, with deep, rocky soil derived from limestone parent material	Sorghum, Prosopis, Artemisia, Conyza, and Yucca.	Abundant. Annual herb, up to 3.0 m tall.	1000
ANN_53	1942	IND	Helianthus annuus	2015-11-10	United States	Texas	Pecos	Coyanosa Draw, roadside on U.S. Route 285, SE of Pecos	880	31.0395	-103.137	Desert scrub and riparian vegetation in shallow, rocky soil derived from limestone parent material	Larrea, Prosopis, Xanthium, Baccharis, and Acacia.	Abundant. Annual herb, up to 2.0 m tall.	1000
ANN_54	1951	IND	Helianthus annuus subsp. texanus	2015-11-25	United States	Texas	Dewitt	Roadside on Texas State Highway 87, at intersection with Mueller Road, S of Westhoff and N of Cuero	90	29.1136	-97.3984	Grassland and weedy roadside on flat, with deep soil derived from limestone	Celtis, Acacia, and Sorghum.	Abundant. Annual herb, up to 2.0 m tall.	1000
ANN_55	1954	IND	Helianthus annuus subsp. texanus	2015-11-26	United States	Texas	Calhoun	Lavaca Bay, roadside on Texas State Highway 35, SW of Point Comfort, near E end of Lavaca Bay Causeway	0	28.6606	-96.5835	Maritime grassland and salt-marsh near seashore, with deep, sandy soil	Opuntia and Acacia.	Locally abundant. Annual herb, up to 1.0 m tall.	100
ANN_56	1956	IND	Helianthus annuus subsp. texanus	2015-11-26	United States	Texas	Aransas	Copano Bay, E shore, near Copano Village, N of Rockport, N of Farm to Market Road 1781	1	28.0885	-97.0601	Saltmarsh with deep soil derived from sand and pulverized sea-shells	Myrica, Baccharis, Solidago, and Salicornia.	Locally abundant. Annual herb, up to 2.0 m tall.	200
ANN_57	1968	IND	Helianthus annuus subsp. texanus	2015-11-29	United States	Texas	Nueces	Intracoastal Waterway, John F. Kennedy Memorial Causeway	0	27.6385	-97.2453	Weedy, disturbed roadside and shore of waterway, with rocky soil derived from silt, beach sand, and limestone road base	Not Recorded.	Infrequent. Annual herb, up to 1.5 m tall.	200
ANN_58	1973	IND	Helianthus annuus subsp. texanus	2015-11-30	United States	Texas	Bee	Skidmore, S side of town, roadside on U.S. Route 181, N of intersection with County Road 612 and S of intersection with County Road 611	35	28.2417	-97.6744	Grassland on flat and roadside, with deep soil	Mimosa and Prosopis.	Abundant. Annual herb, up to 2.0 m tall.	10000
ANN_59	1976	IND	Helianthus annuus subsp. texanus	2015-12-03	United States	Texas	Willacy	Roadside on U.S. Route 77 (Interstate 69E) Frontage Road (W), S of intersection with Farm to Market Road 1762	12	26.5025	-97.7718	Margin of fallow Sorghum field, with deep soil	Not Recorded.	Abundant. Annual herb, up to 1.5 m tall.	1000
ANN_60	1981	IND	Helianthus annuus subsp. texanus	2015-12-04	United States	Texas	Kleberg	Riviera Beach, along shore of Baffin Bay, near intersection of County Road 1155 with County Road 2360	0	27.2852	-97.6673	Maritime grassland and salt-marsh near seashore, with deep, sandy soil	Prosopis and Distichlis.	Infrequent. Annual herb, up to 1.5 m tall.	100
ANN_61	1990	IND	Helianthus annuus subsp. texanus	2015-12-04	United States	Texas	Nueces	Roadside on U.S. 77 Frontage Road, just NE of intersection with Lincoln Avenue	20	27.7765	-97.668	Margin of fallow Sorghum field, with deep soil	Celtis.	Abundant. Annual herb, up to 1.5 m tall.	500
ANN_62	2157	IND	Helianthus annuus	2011-10-02	United States	Iowa	Woodbury	Along east side of Wolf Creek Ditch, between Hwy 141 and old Hwy 141; adjacent to Table Marsh WMA	329	42.2484	-96.0587	Undisturbed wetland and elevated dike road	Not Recorded.	Infrequent. Annual herb, up to 3.0 m tall.	500
ANN_63	2156	IND	Helianthus annuus	2011-10-03	United States	Iowa	Mills	Off exit 35 from I-29 just south of Omaha, by the west side of the gas station	290	41.0465	-95.8229	Marshy waste place near a recently abandoned construction site	Not Recorded.	Abundant. Annual herb, up to 3.0 m tall.	1000
ANN_64	2154	IND	Helianthus annuus	2011-10-06	United States	Kansas	Phillips	Between Victory Rd and Hwy 9 on East 1400 Rd; between Agra and Kirwin	550	39.6889	-99.0661	Grassy fallow land and weedy roadside vegetation	Not Recorded.	Abundant. Annual herb, up to 2.5 m tall.	2000
ANN_65	2153	IND	Helianthus annuus	2011-10-06	United States	Kansas	Norton	Washington St, just east of the junction with Hwy 36	709	39.8281	-99.9072	Grassy fallow land and weedy roadside ditch	Not Recorded.	Locally abundant. Annual herb, up to 2.0 m tall.	700
ANN_66	2166	UBC	Helianthus annuus	2011-09-26	Canada	Manitoba		Unnamed dirt road north of Whitewater Lake	505	49.2965	-100.409	Marshy roadside ditch along fallow land	Not Recorded.	Locally abundant. Annual herb, up to 1.5 m tall.	200
ANN_67	2155	IND	Helianthus annuus	2011-10-04	United States	Missouri	Andrew	Off Hwy 71N, between Road 140 and the next cross street north	324	40.077	-94.8687	Grassy roadside and deep irrigation ditch/ravine with shrubby vegetation	Not Recorded.	Abundant. Annual herb, up to 2.0 m tall.	1000
ANN_68	2162	IND	Helianthus annuus	2011-09-28	United States	North Dakota	McLean	Access road to Cross Ranch State Park	525	47.2426	-101.043	Grassland along railway and rangeland	Not Recorded.	Abundant. Annual herb, up to 1.0 m tall.	10000
ANN_69	2160	IND	Helianthus annuus	2011-09-29	United States	South Dakota	Hughes	Near the junction of Hwy 83 and 14; north-east of Pierre	549	44.501	-100.072	Weedy roadside ditch and fallow land surrounding pond	Not Recorded.	Locally abundant. Annual herb, up to 2.0 m tall.	800
ANN_70	2158	IND	Helianthus annuus	2011-10-01	United States	South Dakota	Union	Off frontage road 471 Ave; east of the I-29 past Spink	381	42.8228	-96.7859	Grasland on flat and roadside	Not Recorded.	Abundant. Annual herb, up to 2.5 m tall.	2000
ANN_71	2168	UBC	Helianthus annuus	2011-09-27	Canada	Saskatchewan		Hwy 47 north of Estevan; on unnamed gravel road, between a gas station and marsh	585	49.2318	-102.988	Weedy vegetation in a marshy waste place	Not Recorded.	Abundant. Annual herb, up to 1.5 m tall.	2000
ARG_01	1877	IND	Helianthus argophyllus	2015-10-20	United States	Texas	Guadalupe	San Marcos River Valley, roadside on U.S. Route 10, immediately E of Exit 625	133	29.6465	-97.6909	Grassland and weedy herbaceous vegetation on roadside, with deep soil	Vitis, Sorghum, and Andropogon.	Infrequent. Annual herb, up to 4.0 m tall.	100
ARG_02	1878	IND	Helianthus argophyllus	2015-10-20	United States	Texas	Gonzales	Roadside on U.S. Route 80, N of Leesville, just NE of intersection with County Road 102	125	29.439	-97.7384	Grassland on roadside, with deep, sandy soil	Schinus.	Abundant. Annual herb, up to 4.0 m tall.	1000
ARG_03	1879	IND	Helianthus argophyllus	2015-10-20	United States	Texas	Gonzales	Roadside on County Road 131, N of Nixon	105	29.3194	-97.7441	Grassland, pasture, and weedy roadside on flat, with deep, sandy soil	Croton and Quercus.	Abundant. Annual herb, up to 5.0 m tall.	1000
ARG_04	1948	IND	Helianthus argophyllus	2015-11-25	United States	Texas	Guadalupe	Roadside on Farm to Market Road 1150, just W of intersection with Nixon Road	140	29.6015	-97.7088	Weedy roadside on flat, with deep, sandy soil	Quercus and Juniperus.	Abundant. Annual herb, up to 3.0 m tall.	1000
ARG_05	1949	IND	Helianthus argophyllus	2015-11-25	United States	Texas	Gonzales	Guadalupe River Valley, roadside on County Road 104, W of intersection with County Road 105	104	29.4513	-97.6954	Weedy roadside on small hill crest, with deep, sandy soil	Quercus, Celtis, Sorghum, and Opuntia.	Infrequent. Annual herb, up to 4.0 m tall.	15
ARG_06	1950	IND	Helianthus argophyllus	2015-11-25	United States	Texas	Gonzales	Roadside on Texas State Highway 87, just E of intersection with Higgenbottham Road, E of Nixon, W of Smiley	100	29.2719	-97.6697	Weedy roadside vegetation on roadside, with deep, sandy soil	Opuntia, Quercus, Prosopis, Xanthium, and Rubus.	Abundant. Annual herb, up to 4.0 m tall.	1000
ARG_07	1952	IND	Helianthus argophyllus	2015-11-25	United States	Texas	Goliad	Manahuilla Creek, just N of U.S. Route 83 bridge, N of Goliad	50	28.7001	-97.3877	Weedy riparian vegetation near creek, with deep soil derived from sand	Quercus, Acacia, Sorghum, Helianthus, and Celtis.	Abundant. Annual herb, up to 3.5 m tall.	10000
ARG_08	1953	IND	Helianthus argophyllus	2015-11-25	United States	Texas	Victoria	Guadalupe River Valley, roadside on U.S. Route 59, vicinity of Stubbs Lake, W of Victoria	20	28.7367	-97.0315	Grassland on flat and E-facing slope, with deep, sandy soil	Quercus, Celtis, and Opuntia.	Abundant. Annual herb, up to 4.0 m tall.	10000
ARG_09	1955	IND	Helianthus argophyllus	2015-11-26	United States	Texas	Aransas	Roadside on Texas State Highway 35, just N of Holiday Beach	4	28.1814	-96.9948	Grassland and weedy roadside vegetation, with deep, sandy soil	Prosopis and Quercus.	Locally abundant. Annual herb, up to 3.0 m tall.	10000
ARG_10	1958	IND	Helianthus argophyllus	2015-11-26	United States	Texas	Aransas	Roadside on Texas State Highway 35, at intersection with Loop Road 1781 and Fulton Beach Road	7	28.1081	-97.0288	Weedy roadside and grassland amongst oak woodland, with deep, sandy soil	Quercus, Persea, Vitis, Ilex, and Helianthus.	Infrequent. Annual herb, up to 1.0 m tall.	1000
ARG_11	1959	IND	Helianthus argophyllus	2015-11-26	United States	Texas	Aransas	Shell Ridge area, S side of Rockport, roadside on Texas State Highway 35, W side of road, N of 16th Street and S of 12th Street	0	27.9971	-97.0764	Coastal grassland on flat (sandy hill and ridge; above tide line) amongst salt marsh, with deep, sandy soil	Andropogon, Tamarix, and Salicornia.	Infrequent. Annual herb, up to 3.0 m tall.	10000
ARG_12	1960	IND	Helianthus argophyllus	2015-11-26	United States	Texas	Aransas	Roadside on Texas State Highway 35, Business, N of Aransas Pass, N of intersection with West Moore Avenue	0	27.9327	-97.123	Grassland and salt marsh on flat, with deep, sandy soil	Andropogon, Quercus, Ilex, Typha, Rhus, and Hydrocotyle.	Abundant. Annual herb, up to 3.0 m tall.	10000
ARG_13	1961	IND	Helianthus argophyllus	2015-11-27	United States	Texas	Nueces	Port Aransas, I.B. Magee Beach, just N of parking lot at end of North on the Beach, near campground	6	27.8327	-97.0494	Coastal scrub on semi-stablilized dunes just W of beach, with deep, sandy soil	Croton, Ipomoea, and Andropogon.	Abundant. Annual herb, up to 2.0 m tall.	10000
ARG_14	1962	IND	Helianthus argophyllus	2015-11-27	United States	Texas	Aransas	San Jose Island, S end, just N of Port Aransas, N side of Aransas Pass (channel between San Jose Island and Mustang Island)	7	27.8469	-97.0487	Maritime grassland on N slope of stabilized sand dunes, with deep, sandy soil	Andropogon, Opuntia, and Croton.	Infrequent. Annual herb, up to 3.0 m tall.	100
ARG_15	1963	IND	Helianthus argophyllus	2015-11-27	United States	Texas	Nueces	Mustang Island, NW side, just N of Port Aransas Nature Preserve, near W end of Port Street	0	27.8348	-97.0883	Maritime grassland on flat, with deep, sandy soil	Ambrosia, Senna, Hazardia, Distichlis, and Opuntia.	Locally abundant. Annual herb, up to 4.0 m tall.	10000
ARG_16	1964	IND	Helianthus argophyllus	2015-11-28	United States	Texas	Nueces	Fish Pass, just S of unnamed dirt road off of Texas State Highway 361, running along north shore of Fish Pass, trending SE to NW	0	27.686	-97.1767	Maritime grassland on flat, with deep, sandy soil	Andropogon, Baccharis, Salicornia, and Avicennia.	Locally abundant. Annual herb, up to 4.0 m tall.	1000
ARG_17	1965	IND	Helianthus argophyllus	2015-11-28	United States	Texas	Nueces	Mustang Island, immediately N of Packery Channel, vicinity of boat launch S of Zahn Road, E of Texas State Highway 361	3	27.6182	-97.2118	Maritime grassland on flat, with deep, sandy soil	Croton and Ambrosia.	Abundant. Annual herb, up to 4.0 m tall.	10000
ARG_18	1966	IND	Helianthus argophyllus	2015-11-28	United States	Texas	Kleberg	North Padre Island, Bird Basin, roadside on South Padre Island Drive, at turn-off for beach access	3	27.4782	-97.2809	Maritime grassland in lee of dunes, with deep, sandy soil	Andropogon and Croton.	Infrequent. Annual herb, up to 2.0 m tall.	100
ARG_19	1967	IND	Helianthus argophyllus	2015-11-28	United States	Texas	Nueces	North Padre Island, Padre Balli Park, at point where Access Road 6 meets beach, just S of Bob Hall Pier	0	27.5794	-97.2215	Dune scrub on East-facing, semi-stabilized dunes, with deep, sandy soil	Croton and Ipomoea.	Abundant. Annual herb, up to 1.5 m tall.	10000
ARG_20	1969	IND	Helianthus argophyllus	2015-11-29	United States	Texas	Nueces	Flour Bluff, adjacent to lower (southern) Oso Bay, along unnamed road running SW from Flour Bluff Drive toward Oso Bay	4	27.6611	-97.3114	Disturbed grassland on flat, with deep soil derived from sand	Croton, Quercus, Andropogon, and Sorghum.	Abundant. Annual herb, up to 4.0 m tall.	10000
ARG_21	1970	IND	Helianthus argophyllus	2015-11-30	United States	Texas	San Patricio	Venado Mill, vicinity of Venado Swale, Welder Wilflife Refuge, N of Sinton	8	28.1215	-97.3924	Grassland on flat, with deep, sandy soil	Prosopis, Andropogon, Croton, and Helianthus.	Abundant. Annual herb, up to 3.5 m tall.	10000
ARG_22	1972	IND	Helianthus argophyllus	2015-11-30	United States	Texas	Refugio	Mission River Valley, SW of Refugio, roadside on Exxon Road, just S of intersection with Kelley Road, just SE of U.S. Route 77	13	28.2785	-97.2976	Grassland on flat and weedy roadside, with deep, sandy soil	Mimosa, Quercus, and Croton.	Abundant. Annual herb, up to 5.0 m tall.	10000
ARG_23	1974	IND	Helianthus argophyllus	2015-12-02	United States	Texas	Brooks	Rachal, at intersection of Farm to Market Road 755 and U.S. Route 281	35	26.8902	-98.137	Grassland on flat, with deep, sandy soil	Celtis, Prosopis, Opuntia, and Helianthus.	Abundant. Annual herb, up to 4.0 m tall.	1000
ARG_24	1977	IND	Helianthus argophyllus	2015-12-03	United States	Texas	Kenedy	Armstrong, roadside on U.S. Route 77	11	26.924	-97.7922	Grassland along railroad tracks, with deep, sandy soil	Not Recorded.	Abundant. Annual herb, up to 4.0 m tall.	1000
ARG_25	1978	IND	Helianthus argophyllus	2015-12-03	United States	Texas	Kenedy	Roadside on U.S. Route 77, S of Sarita	5	27.1596	-97.7941	Grassland on flat and swale adjacent to road, with deep, sandy soil	Prosopis and Quercus.	Abundant. Annual herb, up to 4.0 m tall.	10000
ARG_26	1980	IND	Helianthus argophyllus	2015-12-03	United States	Texas	Kleberg	Los Olmos Creek, roadside on Route U.S. Route 77, N of Sarita	0	27.2734	-97.8031	Grassland on tidally-influenced creek bank, with deep, sandy soil	Prosopis and Yucca.	Abundant. Annual herb, up to 4.0 m tall.	10000
ARG_27	1982	IND	Helianthus argophyllus	2015-12-04	United States	Texas	Brooks	Roadside on U.S. Route 281, S of Falfurrias	35	27.1425	-98.15	Grassland on flat, with deep, sandy soil	Prosopis.	Abundant. Annual herb, up to 4.0 m tall.	10000
ARG_28	1984	IND	Helianthus argophyllus	2015-12-04	United States	Texas	Brooks	Roadside on U.S. Route 281, N of Encino	40	27.0022	-98.1358	Grassland openings in forest, with deep, sandy soil	Quercus and Prosopis.	Locally abundant. Annual herb, up to 3.5 m tall.	10000
ARG_29	1986	IND	Helianthus argophyllus	2015-12-04	United States	Texas	Brooks	Roadside on U.S. Route 281, S of Falfurrias, near rest area	35	27.1001	-98.147	Grassland on flat and shallow swale, with deep, sandy soil	Quercus and Prosopis.	Locally abundant. Annual herb, up to 3.0 m tall.	1000
ARG_30	1988	IND	Helianthus argophyllus	2015-12-04	United States	Texas	Kleberg	Roadside on Texas State Highway 285, W of Riviera, E of Falfurrias	30	27.2574	-97.9459	Grassland and weedy roadside on flat, with deep, sandy soil	Quercus and Prosopis.	Infrequent. Annual herb, up to 3.0 m tall.	100
PET_01	1808	IND	Helianthus petiolaris subsp. fallax	2015-09-13	United States	Arizona	Coconino	South Lake Mary Road (Forest Road 3)	2140	35.1371	-111.642	Grassland transitional to forest on gentle, N-facing slope, with deep soil from volcanic parent material	Pinus, Verbascum, Ambrosia, Grindelia, and Helianthus.	Locally abundant. Annual herb, up to 0.5 m tall.	1000
PET_02	1810	IND	Helianthus petiolaris subsp. fallax	2015-09-13	United States	Arizona	Yavapi	Hart Well Canyon, roadside on Lincoln Canyon Road	1445	34.917	-111.91	Woodland on flat, with deep soil from sandstone parent material	Juniperus, Quercus, Pinus, and Yucca.	Locally abundant. Annual herb, up to 1.5 m tall.	500
PET_03	1812	IND	Helianthus petiolaris subsp. fallax	2015-09-14	United States	Arizona	Coconino	Sunset Crater area, roadside on Forest Road 776, near intersection with State Route 89A	2075	35.3312	-111.541	Open forest on flat, with grassland in the openings and deep soil from volcanic parent material	Pinus, Juniperus, Ribes, Artemisia, Ericameria, and Salsola.	Infrequent. Annual herb, up to 0.6 m tall.	500
PET_04	1814	IND	Helianthus petiolaris subsp. fallax	2015-09-14	United States	Arizona	Coconino	Sunset Crater area, roadside on State Route 89A	2166	35.3903	-111.578	Open forest on gentle, N-facing hillside, with deep soil from volcanic parent material	Pinus, Juniperus, Ericameria, and Salsola.	Locally abundant. Annual herb, up to 1.5 m tall.	10000
PET_05	1816	IND	Helianthus petiolaris subsp. fallax	2015-09-14	United States	Arizona	Apache	Chambers, W side, roadside on U.S. Route 40	1755	35.1539	-109.502	Shrubland on flat and roadside, with deep soil from sandstone	Artemisia, Salsola, Atriplex, and Juniperus.	Locally abundant. Annual herb, up to 1.5 m tall.	1000
PET_06	1819	IND	Helianthus petiolaris subsp. fallax	2015-09-15	United States	New Mexico	San Miguel	Pecos River Canyon, N of Rowe, roadside on Cactus Drive	2110	35.5165	-105.685	Woodland with grassland openings on gentle, E-facing slope, with deep soil from sandstone parent material	Juniperus, Pinus, Ericameria, and Salsola.	Abundant. Annual herb, up to 1.5 m tall.	1000
PET_07	1821	IND	Helianthus petiolaris subsp. fallax	2015-09-16	United States	New Mexico	Colfax	Vermejo River Canyon, roadside on U.S. Interstate Highway 25	1795	36.4967	-104.57	Grassland on alluvial bench adjacent to river, with deep soil from alluvium	Salsola and Yucca.	Abundant. Annual herb, up to 2.0 m tall.	10000
PET_08	1823	IND	Helianthus petiolaris subsp. fallax	2015-09-16	United States	Colorado	Costilla	Sangre de Cristo Creek, roadside on U.S. Route 160	2545	37.529	-105.297	Grassland on steep, E-facing roadcut and hillside, with shallow, rocky soil derived from volcanic parent material	Artemisia, Ericameria, Verbascum, and Chenopodium.	Infrequent. Annual herb, up to 0.5 m tall.	500
PET_09	1824	IND	Helianthus petiolaris subsp. fallax	2015-09-17	United States	Colorado	Alamosa	Great Sand Dunes area, roadside on County Lane 6	2325	37.6628	-105.641	Grassland on flats and rolling hills, with deep soil derived from sand	Ericameria, Salsola, and Atriplex.	Abundant. Annual herb, up to 1.5 m tall.	1000
PET_10	1825	IND	Helianthus petiolaris subsp. fallax	2015-09-17	United States	Colorado	Chaffee	Poncha Pass area, Poncha Creek Canyon, roadside on U.S. Route 285	2460	38.4775	-106.088	Shrubland on steep, W-facing slope, with shallow, rocky soil derived from granite parent material	Pinus, Ericameria, Juniperus, and Artemisia.	Locally abundant. Annual herb, up to 0.5 m tall.	500
PET_11	1826	IND	Helianthus petiolaris subsp. fallax	2015-09-17	United States	Colorado	Gunnison	Gunnison River Canyon, Blue Mesa Reservior, N shore, W of Gunnison, roadside on U.S. Route 50	2295	38.4895	-107.038	Grassland on gentle, S-facing hillside, with deep soil derived from sand (sand dunes)	Salsola and Pinus.	Locally abundant. Annual herb, up to 0.5 m tall.	200
PET_12	1840	IND	Helianthus petiolaris subsp. fallax	2015-10-03	United States	Arizona	Mohave	Kaibab Plateau, Cane Beds area, roadside on Arizona State Route 389, just W of intersection with Yellow Stone Road	1570	36.9	-112.919	Grassland on flat, with deep soil derived from sand	Salsola, Artemisia, Ericameria, and Juniperus.	Locally abundant. Annual herb, up to 0.5 m tall.	1000
PET_13	1842	IND	Helianthus petiolaris subsp. fallax	2015-10-03	United States	Utah	Kane	Co-op Creek Canyon, N of the White Cliffs, roadside on State Route 9, just E of Zion National Park Entrance	1805	37.2379	-112.851	Woodland and grassland on gentle, S-facing slope and roadcut, with shallow, rocky soil derived from sandstone	Ericameria, Artemisia, Quercus, Juniperus, and Pinus.	Locally abundant. Annual herb, up to 1.0 m tall.	50
PET_14	1850	IND	Helianthus petiolaris subsp. petiolaris	2015-10-11	United States	Utah	Uintah	Uinta Mountains, Whiterocks River Canyon, roadside on Forest Road 492	2140	40.5504	-109.916	Grassland on gentle, W-facing slope of canyon, with rocky soil derived from volcanic parent material	Amelanchier, Ericameria, Artemisia, Xanthium, and Juniperus.	Abundant. Annual herb, up to 0.5 m tall.	100
PET_15	1853	IND	Helianthus petiolaris subsp. petiolaris	2015-10-13	United States	Colorado	Larimer	Cache la Poudre River Canyon, just W of the town of Rustic, roadside on Pudre Canyon Road (Colorado State Highway 14)	2240	40.6971	-105.612	Grassland on disturbed roadcut and hillside, with rocky soil derived from granite parent material	Pinus, Juniperus, Purshia, Artemisia, Salix, Populus, and Verbascum.	Abundant. Annual herb, up to 1.0 m tall.	1000
PET_16	1855	IND	Helianthus petiolaris subsp. petiolaris	2015-10-14	United States	Colorado	Weld	South Platte River, S bank, Roadside on U.S. Route 34, SE of Kersey	1415	40.3805	-104.523	Grassland on roadcut and sandy bluff at roadside, with soil from alluvium	Salsola and Artemisia.	Abundant. Annual herb, up to 1.0 m tall.	1000
PET_17	1856	IND	Helianthus petiolaris subsp. petiolaris	2015-10-14	United States	Colorado	Weld	Klug Lake area, roadside on County Road 49, just N of intersection with County Road 22	1510	40.1516	-104.603	Grassland on E-facing roadcut and adjacent knoll, with deep soil derived from sand	Salsola, Amaranthus, Hesperoyucca, and Opuntia.	Abundant. Annual herb, up to 1.0 m tall.	10000
PET_18	1857	IND	Helianthus petiolaris subsp. petiolaris	2015-10-14	United States	Colorado	Adams	Denver International Airport area, roadside on E 120th Avenue, E of Hayesmount Road and W of Watkins Road	1595	39.9137	-104.615	Grassland on steep, S-facing roadcut and knoll, with deep soil derived from sand	Salsola, Rumex, Opuntia, and Yucca.	Abundant. Annual herb, up to 1.5 m tall.	1000
PET_19	1858	IND	Helianthus petiolaris subsp. petiolaris	2015-10-14	United States	Colorado	Arapahoe	Strasburg area, S of Strasburg, roadside on E Quincy Road just W of intersection with Strasburg Road	1720	39.6371	-104.335	Grassland on flat and roadcut, with deep, sandy soil	Amaranthus and Verbascum.	Abundant. Annual herb, up to 1.5 m tall.	1000
PET_20	1859	IND	Helianthus petiolaris subsp. petiolaris	2015-10-15	United States	Kansas	Barton	Great Bend area, N bank of Arkansas River, roadside on U.S. Route 56, just NE of intersection with SW 20 Road	585	38.3336	-98.8381	Grassland on flat and roadside ditch, with deep, sandy soil derived from alluvium	Conyza and Helianthus.	Abundant. Annual herb, up to 1.0 m tall.	100
PET_21	1860	IND	Helianthus petiolaris subsp. petiolaris	2015-10-15	United States	Kansas	Barton	Arkansas River, S bank, roadside on SE 20 Road, just W of intersection with SE 50 Avenue	570	38.3335	-98.6916	Grassland at forest edge on S-facing slope and roadcut, with deep, sandy soil	Fraxinus and Catalpa.	Abundant. Annual herb, up to 1.0 m tall.	1000
PET_22	1862	IND	Helianthus petiolaris subsp. petiolaris	2015-10-15	United States	Kansas	Ellsworth	Kanopolis Lake area, Roadside on 29th Road, just S of intersection with Avenue V	465	38.565	-97.9617	Grassland on knoll and E-facing roadcut, with rocky soil derived from sandstone	Celtis, Yucca, and Solidago.	Abundant. Annual herb, up to 1.5 m tall.	10000
PET_23	1863	IND	Helianthus petiolaris subsp. petiolaris	2015-10-16	United States	Kansas	Sedgwick	Wichita Valley Center Floodway and Levee, W of Floodway and N of Route 400	404	37.676	-97.4065	Grassland on bank of floodway and slopes of levee, with deep, sandy soil	Not Recorded.	Abundant. Annual herb, up to 1.0 m tall.	1000
PET_24	1865	IND	Helianthus petiolaris subsp. petiolaris	2015-10-16	United States	Kansas	Harper	Chikaskia River, W bank, E of Runnymede, roadside on K-2	415	37.3794	-97.8877	Grassland on flat, small ridge, and roadside, with deep, sandy soil	Helianthus, Solidago, Andropogon, Lespedeza, and Artemisia.	Infrequent. Annual herb, up to 1.5 m tall.	50
PET_25	1867	IND	Helianthus petiolaris subsp. petiolaris	2015-10-16	United States	Oklahoma	Woods	Salt Fork Arkansas River watershed, N of Alva, roadside on U.S. Route 281	415	36.8337	-98.6481	Grassland on roadside and gentle, SW-facing slope, with sandy soil	Amaranthus, Prunus, and Sorghum.	Infrequent. Annual herb, up to 0.5 m tall.	1000
PET_26	1868	IND	Helianthus petiolaris subsp. petiolaris	2015-10-17	United States	Oklahoma	Woods	Little Sahara Sand Dunes Area, S of Waynoka, roadside on Sahara Drive, just N of campground	465	36.5634	-98.8894	Shrubland and grassland on flat and roadside ditch, with deep, sandy soil	Juniperus, Prunus, Artemisia, and Andropogon.	Infrequent. Annual herb, up to 2.0 m tall.	100000
PET_27	1869	IND	Helianthus petiolaris subsp. petiolaris	2015-10-17	United States	Oklahoma	Woods	Little Sahara Sand Dunes, edge of dune area, NE corner close to observation deck and campground	470	36.558	-98.8954	Grassland on semi-stabilized dune ridge, with sandy soil	Prunus and Yucca.	Abundant. Annual herb, up to 2.0 m tall.	10000
PET_28	1870	IND	Helianthus petiolaris subsp. petiolaris	2015-10-17	United States	Oklahoma	Alfalfa	Salt Plains, S of Oklahoma State Highway 11	350	36.7993	-98.2497	Grassland on island in salt plains, with deep soil derived from sediment and sand	Tamarix and Rhus.	Abundant. Annual herb, up to 1.5 m tall.	1000
PET_29	1872	IND	Helianthus petiolaris subsp. petiolaris	2015-10-17	United States	Oklahoma	Woods	Cimmaron River, E of Cargill Salt Works	480	36.9134	-99.2354	Grassland on flat (small island) in the bed of the river, with deep soil derived from alluvium	Artemisia and Bouteloua.	Abundant. Annual herb, up to 1.5 m tall.	1000
PET_30	1873	IND	Helianthus petiolaris subsp. petiolaris	2015-10-17	United States	Oklahoma	Woodward	Roadside on Interstate 15, W of Woodward	660	36.4075	-99.5559	Grassland on roadcut and sandy ridge, with deep, sandy soil	Yucca, Artemisia, Salsola, Conyza, and Juniperus.	Abundant. Annual herb, up to 1.8 m tall.	1000
PET_31	1874	IND	Helianthus petiolaris subsp. petiolaris	2015-10-18	United States	Texas	Gray	Alanreed area, roadside on Farm to Market Road 291, near intersection with CC Road	900	35.1947	-100.724	Grassland on flat, W-facing roadcut, and roadside ditch, with deep, sandy soil	Yucca and Andropogon.	Abundant. Annual herb, up to 1.5 m tall.	500
PET_32	1922	IND	Helianthus petiolaris subsp. fallax	2015-11-05	United States	Arizona	Santa Cruz	Ophir Gluch, roadside on unnamed road, just N of intersection with E Fish Canyon Road, W of Arizona State Route 83, NW of Sonoita	1475	31.743	-110.689	Grassland and savanna on flat and banks of dry wash, with deep soil derived from volcanic parent material	Quercus.	Abundant. Annual herb, up to 2.0 m tall.	1000
PET_33	1923	IND	Helianthus petiolaris subsp. fallax	2015-11-06	United States	Arizona	Cochise	Huachuca Mountains foothills, roadside on Arizona State Route 92, just N of intersection with East Mandan Drive	1440	31.4759	-110.258	Grassland on gentle, E-facing slope and roadside ditch, with rocky soil derived from volcanic parent material	Salsola, Prosopis, and Baccharis.	Abundant. Annual herb, up to 2.0 m tall.	10000
PET_34	1925	IND	Helianthus petiolaris subsp. fallax	2015-11-06	United States	Arizona	Cochise	Palominas, E side of San Pedro River Valley, roadside Arizona State Route 92	1315	31.3809	-110.069	Grassland on flat and roadside, with deep soil derived from volcanic parent material	Prosopis, Amaranthus, Salsola, and Sorghum.	Abundant. Annual herb, up to 2.0 m tall.	200
PET_35	1926	IND	Helianthus petiolaris subsp. fallax	2015-11-06	United States	Arizona	Cochise	Apache, roadside on Arizona State Route 80, just S of intersection with Skeleton Canyon Road	1345	31.6889	-109.134	Grassland on flat and roadside, with deep soil derived from volcanic parent material	Salsola, Prosopis, and Amaranthus.	Abundant. Annual herb, up to 1.5 m tall.	2000
PET_36	1928	IND	Helianthus niveus subsp. canescens	2015-11-07	United States	New Mexico	Luna	Florida Mountains, W foothills, roadside on Rock Hound Road, SE of Deming	1300	32.1963	-107.687	Desert scrub on flat, with deep, sandy soil	Prosopis, Salsola, and Artemisia.	Locally abundant. Annual herb, up to 0.5 m tall.	1000
PET_37	1929	IND	Helianthus niveus subsp. canescens	2015-11-07	United States	New Mexico	Luna	Arena area, W of Coyote Hill, Roadside on New Mexico State Road 9	1250	31.8201	-107.388	Desert scrub on gentle, S-facing slpe and roadcut, with deep, sandy soil	Atriplex, Prosopis, and Yucca.	Locally abundant. Annual herb, up to 0.5 m tall.	10000
PET_38	1930	IND	Helianthus niveus subsp. canescens	2015-11-07	United States	New Mexico	Doña Ana	Malpais area, SE of Guzmans Lookout Mountain, roadside on County Road A003, just N of international border	1265	31.7901	-107.204	Desert scrub on gentle, E-facing slope of arroyo, with deep, sandy soil derived from volcanic parent material	Larrea, Prosopis, Yucca, Proboscidea, and Salsola.	Locally abundant. Annual herb, up to 1.0 m tall.	10000
PET_39	1931	IND	Helianthus niveus subsp. canescens	2015-11-07	United States	New Mexico	Doña Ana	Santa Teresa area, S of Santa Teresa Airport, E of New Mexico State Route 136, just N of Santa Teresa Port of Entry	1265	31.8115	-106.683	Desert scrub on rolling, semi-stabilized dunes, with deep, sandy soil	Artemisia, Dasylirion, Yucca, and Prosopis.	Locally abundant. Annual herb, up to 3.0 m tall.	1000
PET_40	1933	IND	Helianthus niveus subsp. canescens	2015-11-08	United States	Texas	El Paso	Anthony, N of La Tuna, roadside on Sandia Drive, just W of U.S. Route 10, immediately S of Texas-New Mexico state line	1200	31.9985	-106.584	Grassland on flat, with sandy soil derived from granite	Yucca, Larrea, Prosopis, and Salsola.	Infrequent. Annual herb, up to 1.0 m tall.	100
PET_41	1934	IND	Helianthus niveus subsp. canescens	2015-11-09	United States	New Mexico	Doña Ana	Aden Hills, roadside on CR B005, S of U.S. Route 10	1345	32.2421	-107.063	Desert scrub on flat, with deep soil derived from sand	Prosopis, Salsola, and Yucca.	Locally abundant. Annual herb, up to 1.0 m tall.	500
PET_42	1935	IND	Helianthus niveus subsp. canescens	2015-11-09	United States	New Mexico	Doña Ana	Las Cruces Airport area, roadside on U.S. Route 10 Frontage Road, E of exit 127 off of U.S. Route 10	1350	32.2683	-106.959	Desert scrub on roadside and roadcut (surrounding terrain rolling, semi-stable dunes), with deep, sandy soil	Yucca, Prosopis, and Salsola.	Locally abundant. Annual herb, up to 0.5 m tall.	500
PET_43	1937	IND	Helianthus petiolaris subsp. fallax	2015-11-09	United States	New Mexico	Doña Ana	Organ Mountains, San Augustin Pass area, NE of Baylor Peak, roadside on Aguirre Springs Road, S of intersection with U.S. Route 70	1615	32.4262	-106.548	Grassland on gentle, E-facing slope and roadside ditch, with rocky soil derived from granite parent material	Dasylirion, Salsola, and Prosopis.	Abundant. Annual herb, up to 1.5 m tall.	10000
PET_44	1939	IND	Helianthus niveus subsp. canescens	2015-11-10	United States	Texas	Hudspeth	Rio Grande River valley, SE of Esperanza, roadside on Esperanza Road	1070	31.1503	-105.687	Grassland and desert scrub on flat and arroyo sides, with deep, sandy soil	Prosopis, Artemisia, Solanum, and Salsola.	Locally abundant. Annual herb, up to 1.5 m tall.	1000
PET_45	1940	IND	Helianthus niveus subsp. canescens	2015-11-10	United States	Texas	Culberson	Plateau area, roadside on U.S. Route 10, E of Van Horn	1210	31.0562	-104.571	Grassland on sandy hills with deep, sandy soil	Yucca, Prosopis, and Atriplex.	Locally abundant. Annual herb, up to 1.5 m tall.	100
PET_46	1943	IND	Helianthus petiolaris subsp. fallax	2015-11-10	United States	Texas	Ward	Royalty area, roadside on Texas State Highway 18, N of Royalty and S of Monahans	765	31.4399	-102.875	Grassland on flat and roadside, with deep, sandy soil derived from limestone parent material	Artemisia and Salsola.	Abundant. Annual herb, up to 1.5 m tall.	1000
PET_47	1944	IND	Helianthus petiolaris subsp. fallax	2015-11-11	United States	Texas	Ward	Monahans Sandhills, NE of Monahans, Willow Draw Campground	840	31.6366	-102.817	Grassland and herbaceous vegetation on dunes, with deep soil derived from sand	Andropogon and Ericameria.	Abundant. Annual herb, up to 3.5 m tall.	10000
PET_48	1945	IND	Helianthus petiolaris subsp. fallax	2015-11-11	United States	Texas	Winkler	Roadside on County Road 306, just E of intersection with Texas State Highway 18	840	31.7185	-103.032	Grassland on flat, with deep, sandy soil	Quercus, Yucca, Prosopis, and Ericameria.	Abundant. Annual herb, up to 1.5 m tall.	10000
PET_49	1946	IND	Helianthus petiolaris subsp. fallax	2015-11-11	United States	Texas	Winkler	The Dunes at Kermit, roadside on N Farm to Market Road 874, just SW of intersection with Texas State Highway 115	925	31.9535	-102.979	Grassland on mobile dune crests, with deep soil derived from sand	Salix, Andropogon, and Yucca.	Abundant. Annual herb, up to 3.0 m tall.	100000
PET_50	1947	IND	Helianthus petiolaris subsp. fallax	2015-11-11	United States	Texas	Martin	Patricia area, roadside on Texas State Highway 349, S of Patricia and N of Midland	905	32.5094	-102.046	Disturbed herbaceous formation on roadside near edge of sorghum field, with deep soil derived from sand	Salsola, Amaranthus, and Sorghum.	Abundant. Annual herb, up to 1.0 m tall.	1000

## Sheet: Climatic variables legend
Abbreviation	Topo-climatic variable
Latitude	Latitude (˚)
Longitude	Longitude (˚)
Elevation	Elevation (m)
MAT	mean annual temperature (°C)
MWMT	mean warmest month temperature (°C)
MCMT	mean coldest month temperature (°C)
TD	temperature difference between MWMT and MCMT, or continentality (°C)
MAP	mean annual precipitation (mm)
MSP	May to September precipitation (mm)
AHM	annual heat-moisture index (MAT+10)/(MAP/1000))
SHM	summer heat-moisture index ((MWMT)/(MSP/1000))
DD<0	degree-days below 0°C, chilling degree-days
DD>5	degree-days above 5°C, growing degree-days
DD<18	degree-days below 18°C, heating degree-days
DD>18	degree-days above 18°C, cooling degree-days
NFFD	the number of frost-free days
FFP	frost-free period
bFFP	the day of the year on which FFP begins
eFFP	the day of the year on which FFP ends
PAS	precipitation as snow (mm) between August in previous year and July in current year
EMT	extreme minimum temperature over 30 years
EXT	extreme maximum temperature over 30 years
Eref	Hargreaves reference evaporation (mm)
CMD	Hargreaves climatic moisture deficit (mm)
RH	mean annual relative humidity (%)

## Sheet: Soil variables legend
Abbreviation	Soil variable
OM	organic matter (%)
P1	phosphorus, weak Bray (ppm)
P2	phosphorus, strong Bray (ppm)
BICARB	sodium bicarbonate (ppm)
K	potassium (ppm)
MG	magnesium (ppm)
CA	calcium (ppm)
NA	sodium (ppm)
PH	soil pH
CEC	cation exchange capacity (meq/100g)
PERCENT_K	percent base saturation K (%)
PERCENT_MG	percent base saturation Mg (%)
PERCENT_CA	percent base saturation Ca (%)
PERCENT_NA	percent base saturation Na (%)
SOL_SALTS	soluble salts (mmhos/cm)

## Sheet: Phenotypic traits legend
Category	Phenotype	Description	Measurement
PLANT DEVELOPMENT	Flowering time
	TLN	Total Leaf Number; number of true leaves on the main stem	The total number of true leaves on the main stem was determined after anthesis
	DTF	Age of the plant at budding	Number of days passed between the transplant date and the date at which the first flower bud became visible
	Days_to_budding	Age of the plant at anthesis	Number of days passed between the transplant date and the date at which pollen was first produced in the first flower head
	Growth rate
	LIR	Leaf Initiation Rate; speed at which new leaves are generated	Ratio between TLN and Days_to_budding
PLANT ARCHITECTURE	Plant architecture
	Stem_diamater_at_flowering	Primary stem diameter at anthesis	Primary stem diameter was measured after the first node with a digital caliper, on the day in which the first inflorescence started producing pollen.
	Plant_height_at_flowering	Total length of the main stem	Length of the main stem after flowering and after elongation was complete
	Peduncle_length	Length of the peduncle of the first flower	Length of the peduncle was measured in the field after anthesis
	Internode_length	Average length of an internode	Ratio between plant height and number of nodes (approximated as total leaf number)
	Stem_diameter_final_before_1st_node	Diameter of the stem base of fully developed plants	Primary stem diameter was measured before the first node with a digital caliper, on the day in which the plants were removed from the field (Oct. 2016)
	Stem_diameter_final_after_5th_node	Diameter of the stem of fully developed plants	Primary stem diameter was measured after the fifth node with a digital caliper, on the day in which the plants were removed from the field (Oct. 2016)
	Distance_of_first_branching_from_ground	Distance between ground and first node
	Primary_branches	Number of branches on the main stem	The total number of true leaves on the main stem was determined after anthesis, and shortly before the plants were removed from the field (Oct. 2016)
CARBON NITROGEN CONTENT	Carbon nitrogen content
	Leaf_total_N	Amount of nitrogen in leaf tissue	Leaf tissue was dried in an oven for 3 days at 65ºC and then ground in individual 2 ml tubes containing one 0.3 cm metal bead using a TissueLyser (Qiagen, Hilden, Germany). Three to five mg of ground tissue were packed in tin cups and sent for inorganic element analysis to the Pacific Centre for Isotopic and Geochemical Research of the University of British Columbia
	Leaf_total_C	Amount of carbon in leaf tissue	Leaf tissue was dried in an oven for 3 days at 65ºC and then ground in individual 2 ml tubes containing one 0.3 cm metal bead using a TissueLyser (Qiagen, Hilden, Germany). Three to five mg of ground tissue were packed in tin cups and sent for inorganic element analysis to the Pacific Centre for Isotopic and Geochemical Research of the University of British Columbia
	Leaf_C_N_ratio	Ratio between carbon and nitrogen content in leaf tissue
INFLORESCENCE TRAITS	Inflorescence architecture
	Disk_diameter	Diameter of the inflorescence disk	Average of two perpendicular inflorescence disk diameter measurements performed on each of the first three inflorescences produced by each plant. Inflorescences were collected in the field, and front and back digital pictures were taken in the lab using a setup that provided even illumination. A size and colour standard was included in each picture. Measurements were taken using the Fiji software…
	Flower_head_diameter	Diameter of the inflorescence	see "Disk_diameter"
	Flower_FHDD_ratio	Ratio between Inflorescence and disk diameters
	Ligules
	Ligule_length	Length of individual ligules	Average of three ligules length measurements performed on each of the first three inflorescences produced by each plant. Inflorescences were collected in the field, and front and back digital pictures were taken in the lab using a setup that provided even illumination. A size and colour standard was included in each picture. Measurements were taken using the Fiji software (Schneider et al., 2012;…
	Ligule_width	Maximum width of individual ligules	Averages maximum width of three ligules each from three inflorescences.
	Ligule_LW_ratio	Ratio between ligule length and maximum width
	Ligules_number	Average number of ligule per Inflorescence	Ligules were counted from pictures of the first three inflorescences for each individual.
	Phyllaries
	Phyllaries_diameter	Diameter of phyllaries whorl	Average of two perpendicular phyllaries whorl diameter measurements performed on the first three inflorescences produced by each plant. Inflorescences were collected in the field, and front and back digital pictures were taken in the lab using a setup that provided even illumination. A size and colour standard was included in each picture. Measurements were taken using the Fiji software (Schneide…
	Phyllaries_length	Length of individual phyllaries	Average length of three phyllaries each from three inflorescences.
	Phyllaries_width	Maximum width of individual phyllaries	Averages maximum width of three phyllaries each from three inflorescences.
	Phyllaries_LW_ratio	Ratio between phyllaries length and maximum width
	Flowerhead_to_phyllaries_diameter_ratio	Ratio between flower head and phyllaries whorl diameters
	Disk_to_phyllaries_diameter_ratio	Ratio between flower disk and phyllaries whorl diameters
PIGMENTATION	Anthocyanins
	Stem_colour	Presence and intensity of purple colour on main stem	Pigmentation intensity was determined after anthesis using an ordinal scale from 0 = no purple colouration; to 4 = intense purple colouration
	Petiole_main_veins_colour	Presence and intensity of purple colour on main leaf veins	Pigmentation intensity was determined after anthesis using an ordinal scale from 0 = no purple colouration; to 4 = intense purple colouration
	Darker_axillae	Presence of purple colour on leaf axillae	Presence (1) or absence (0) of patches of purple colour at the axillae of leaves was determined after anthesis
LEAF TRAITS	Leaf architecture
	Leaf_perimeter	Perimeter of an individual leaf	The youngest, fully developed leaf from the primary stem was collected at anthesis and scanned on a flatbed scanner, at a resolution of 300 dpi. A size and colour standard was included in each picture. For morphometric measurements, colours were inverted in Adobe Photoshop to increase contrast. Images were analyzed using Tomato Analyzer (Rodrigues. et al. 2010); leaf boundaries were manually adju…
	Leaf_area	Area of an individual leaf	see "Leaf_Perimeter"
	Leaf_width_mid-height	Width measured at ½ of the leaf’s length	see "Leaf_Perimeter"
	Leaf_maximum_width	Maximum width of the leaf	see "Leaf_Perimeter"
	Leaf_height_mid-width	Length measured at ½ of the leaf’s width	see "Leaf_Perimeter"
	Leaf_maximum_height	Maximum length of the leaf	see "Leaf_Perimeter"
	Leaf_curved_height	Length measured along a curved line through the leaf (equidistant from both leaf borders)	see "Leaf_Perimeter"
	SLA	Specific Leaf Area	The same full leaf that was used for morphometrics was dried in an oven for 3 days at 65ºC and weighed on a precision scale. SLA was calculated as the ratio between Leaf Area and leaf dry weight
	Trichomes
	Trichomes_length	Length of non-glandular trichomes on abaxial side of leaves	A high resolution scan (2400 dpi) was taken for a 1.2 cm wide section of the abaxial side perpendicular to the leaf main vein, of the same leaf used for morphometric measurements. Trichome length was averaged over 10 trichomes, measured using the Fiji (Schneider et al., 2012; Schindelin et al., 2012)
	Trichomes_density_leaf_edge_flat_area	Density of trichomes outside secondary veins near the leaf edge	A high resolution scan (2400 dpi) was taken for a 1.2 cm wide section of the abaxial side perpendicular to the leaf main vein, of the same leaf used for morphometric measurements. The number of non-glandular trichomes was determined in 1 cm2 region near the edge of the leaf and near the main vein. Trichomes on leaf surface or on secondary veins were counted separately using Fiji (Schneider et al.…
	Trichomes_density_leaf_edge_secondary_veins	Density of trichomes on secondary veins near the leaf edge	see "Trichomes_density_leaf_edge_flat_area"
	Trichomes_density_leaf_center_flat_area	Density of trichomes outside secondary veins near the leaf main vein	see "Trichomes_density_leaf_edge_flat_area"
	Trichomes_density_leaf_center_secondary_veins	Density of trichomes on secondary veins near the leaf main vein	see "Trichomes_density_leaf_edge_flat_area"
	Trichomes_density_edge_average	Density of trichomes near the leaf edge	see "Trichomes_density_leaf_edge_flat_area"
	Trichomes_density_center_average	Density of trichomes near the leaf main vein	see "Trichomes_density_leaf_edge_flat_area"
	Trichomes_density_nonvein_average	Density of trichomes outside secondary veins	see "Trichomes_density_leaf_edge_flat_area"
	Trichomes_density_vein_average	Density of trichomes on secondary veins	see "Trichomes_density_leaf_edge_flat_area"
	Leaf shape
	Leaf_curvedHeight_maxWidth	Ratio between curved length and maximum leaf width	see "Leaf_Perimeter"
	Leaf_shape_index_external_I	The ratio of the Maximum Height to Maximum Width	see "Leaf_Perimeter"
	Leaf_shape_index_external_II	The ratio of Height Midwidth to Width Mid-height	see "Leaf_Perimeter"
	Leaf_curved_shape_index	The ratio of Curved Height to the width of the leaf at mid-curved-height, as measured perpendicular to the curved height line	see "Leaf_Perimeter"
	Leaf_ellipsoid	The ratio of the error resulting from a best-fit ellipse to the area of the leaf. Error is the average magnitude of residuals (Res) along the leaf’s perimeter, divided by the length of the major (longer) axis of the ellipse. Smaller values indicate that the leaf is more ellipsoid	see "Leaf_Perimeter"
	Leaf_circular	The ratio of the error resulting from a best-fit circle to the area of the leaf. Error is the average magnitude of residuals (Res) along the leaf’s perimeter, divided by the radius of the circle. Smaller values indicate that the leaf is more circular	see "Leaf_Perimeter"
	Leaf_rectangular	The ratio of the area of the rectangle bounding the leaf to the area of the rectangle bounded by the leaf	see "Leaf_Perimeter"
	Leaf_obovoid	Obovoid is calculated from the maximum width (W), the height at which the maximum width occurs (y), the average width above that height (w1), and the average width below that height (w2), and a scaling function scale_ob as: Obovoid = 1/2 * scale_ob(y) * (1 – w1/W + w2/W) If Obovoid > 0, subtract 0.4. Otherwise, Obovoid is 0	see "Leaf_Perimeter"
	Leaf_width_widest_pos	The ratio of the height at which the maximum width occurs to the Maximum Height	see "Leaf_Perimeter"
	Leaf_eccentricity	The ratio of the height of the internal ellipse to the Maximum Height	see "Leaf_Perimeter"
	Leaf_proximal_eccentricity	The ratio of the height of the internal ellipse to the distance between the bottom of the ellipse and the top of the leaf	see "Leaf_Perimeter"
	Leaf_distal_eccentricity	The ratio of the height of the internal ellipse to the distance between the top of the ellipse and the bottom of the leaf	see "Leaf_Perimeter"
	Leaf_shape_index_internal	The ratio of the internal ellipse’s height to its width	see "Leaf_Perimeter"
	Leaf_eccentricity_area_index	The ratio of the area of the leaf outside the ellipse to the total area of the leaf	see "Leaf_Perimeter"
	Leaf colour
	Total_RGB	Sum of RGB values for leaf colour	A evenly illuminated, representative section was selected for a digital image of a leaf for each line (see "Leaf_perimeter"). RGB values were extracted using the "Color histogram" plugin (https://imagej.nih.gov/ij/plugins/color-histogram.html) for Fiji (Schneider et al., 2012; Schindelin et al., 2012).
	RGB_proportion_green	Proportion of green in average leaf colour	See "Total_RGB". Ratio between values of G and R+G+B.
	RGB_proportion_red	Proportion of red in average leaf colour	See "Total_RGB". Ratio between values of R and R+G+B.
	RGB_proportion_blue	Proportion of blue in average leaf colour	See "Total_RGB". Ratio between values of B and R+G+B.
SEED TRAITS	Seed size
	Seed_perimeter	Perimeter of an individual seed	At least three inflorescences for each plant were bagged before anthesis and manually crossed to another individual from the same population of origin. Seeds were let to dry on the plant, collected, cleaned and store in hermetically sealed box containing silica gel. Eight seeds from each plant were imaged using a high resolution scanner, at a resolution of 2400 dpi. A size and colour standard was…
	Seed_area	Area of an individual seed	see "Seed perimeter"
	Seed_width_mid_height	Width measured at ½ of the seed’s length	see "Seed perimeter"
	Seed_maximum_width	Maximum width of the seed	see "Seed perimeter"
	Seed_height_mid_width	Length measured at ½ of the seed’s width	see "Seed perimeter"
	Seed_maximum_height	Maximum length of the seed	see "Seed perimeter"
	Seed_curved_height	Length measured along a curved line through the seed (equidistant from both seed borders)	see "Seed perimeter"
	Seed shape
	Seed_HW_ratio	Ratio between curved length and maximum seed width	see "Seed perimeter"
	Seed_shape_index_external_I	The ratio of the Maximum Height to Maximum Width	see "Seed perimeter"
	Seed_shape_index_external_II	The ratio of Height Midwidth to Width Mid-height	see "Seed perimeter"
	Seed_curved_shape_index	The ratio of Curved Height to the width of the seed at mid-curved-height, as measured perpendicular to the curved height line	see "Seed perimeter"
	Seed_ellipsoid	The ratio of the error resulting from a best-fit ellipse to the area of the seed. Error is the average magnitude of residuals (Res) along the seed’s perimeter, divided by the length of the major (longer) axis of the ellipse. Smaller values indicate that the seed is more ellipsoid	see "Seed perimeter"
	Seed_circular	The ratio of the error resulting from a best-fit circle to the area of the seed. Error is the average magnitude of residuals (Res) along the seed’s perimeter, divided by the radius of the circle. Smaller values indicate that the seed is more circular	see "Seed perimeter"
	Seed_rectangular	The ratio of the area of the rectangle bounding the seed to the area of the rectangle bounded by the seed	see "Seed perimeter"
	Seed_ovoid	Ovoid is calculated from the maximum width (W), the height at which the maximum width occurs (y), the average width above that height (w1), and the average width below that height (w2), and a scaling function scale_ov as: Ovoid = 1/2 * scale_ov(y) * (1 – w2/W + w1/W). If Ovoid > 0, subtract 0.4. Otherwise, Ovoid is 0	see "Seed perimeter"
	Seed_width_widest_pos	The ratio of the height at which the maximum width occurs to the Maximum Height	see "Seed perimeter"
	Seed_eccentricity	The ratio of the height of the internal ellipse to the Maximum Height	see "Seed perimeter"
	Seed_proximal_eccentricity	The ratio of the height of the internal ellipse to the distance between the bottom of the ellipse and the top of the seed	see "Seed perimeter"
	Seed_distal_eccentricity	The ratio of the height of the internal ellipse to the distance between the top of the ellipse and the bottom of the seed	see "Seed perimeter"
	Seed_shape_index_internal	The ratio of the internal ellipse’s height to its width	see "Seed perimeter"
	Seed_eccentricity_area_index	The ratio of the area of the seed outside the ellipse to the total area of the seed	see "Seed perimeter"
Rodríguez, G. R.; Moyseenko, J. B.; Robbins, M. D.; Huarachi Morejón, N.; Francis,D. M.; and van der Knaap, E. (2010). Tomato Analyzer: A Useful Software Application to Collect Accurate and Detailed Morphological and Colorimetric Data from Two-dimensional Objects. J. Vis. Exp (37): 1856, PMID 20234339, doi:10.3791/1856
Schindelin, J.; Arganda-Carreras, I. & Frise, E. et al. (2012), "Fiji: an open-source platform for biological-image analysis", Nature methods 9(7): 676-682, PMID 22743772, doi:10.1038/nmeth.2019
Schneider, C. A.; Rasband, W. S. & Eliceiri, K. W. (2012), "NIH Image to ImageJ: 25 years of image analysis", Nature methods 9(7): 671-675, PMID 22930834
